# Supplementary material for: The effect of proactive, interactive, two-way texting on 12-month retention in antiretroviral therapy: findings from a quasi-experimental study in Lilongwe, Malawi
Source: PubMed Central journal article supplement (PMC10863037; doi:10.1101/2024.01.26.24301855), 2024-01-30
Supplement: NIHPP2024.01.26.24301855v1-supplement-1.pdf [file NIHPP2024.01.26.24301855v1-supplement-1.pdf]

## **Supplemental information**

**S1 File. Dataset.** Retention outcomes dataset in CSV format.
